# Supplementary material for: Dual-anchored configuration involving Pb(NO3)2 for effective and stable FAPbI3 quantum dot solar cells
Source: Royal Society of Chemistry journal article supplement (doi:10.1039/d4tc02697g), 2024-01-01
Supplement: d4tc02697g1.pdf [file d4tc02697g1.pdf]

## Supporting Information

### Dual-Anchored Configuration Involving on $\text{Pb}(\text{NO}_3)_2$ for Effective and Stable $\text{FAPbI}_3$ Quantum Dot Solar Cells

Meidan Que,<sup>a</sup> Shenghui He,<sup>a</sup> Lili Gao,<sup>\*b</sup> Boyue Zhang,<sup>a</sup> Yabo Wang,<sup>a</sup> Jin Chen,<sup>a</sup> Bo Li,<sup>a</sup> Wei Huang,<sup>c</sup> Peng Zhong<sup>\*d</sup>

<sup>a</sup> *College of Materials Science and Engineering, Xi'an University of Architecture and Technology, Xi'an 710055, P. R. China.*

<sup>b</sup> *College of Metallurgical Engineering, Xi'an University of Architecture and Technology, Xi'an 710055, P. R. China.*

<sup>c</sup> *College of Civil Engineering, Xi'an University of Architecture and Technology, Xi'an 710055, P. R. China.*

<sup>d</sup> *School of Advanced Materials and Nanotechnology, Xidian University, Xi'an, 710126, P. R. China.*

#### \* Corresponding Author:

Lili Gao, E-mail: gll0706@xauxt.edu.cn

Peng Zhong, E-mail: pengzhong@xidian.edu.cn

## Table of Contents

### Supplementary Figures

- Figure S1.** (a) TEM image and (b) the corresponding size distribution of FAPbI<sub>3</sub> quantum dots.
- Figure S2.** The UV- visible absorption and steady-state PL spectrum of FAPbI<sub>3</sub> quantum dot solution in hexane.
- Figure S3.** XRD pattern of FAPbI<sub>3</sub> quantum dot solution.
- Figure S4.** Performance evolutions ( $J_{SC}$ ,  $V_{OC}$ ,  $FF$ , and PCE) of FAPbI<sub>3</sub> quantum dot solar cells using four kinds of Pb-salts (Control, Pb(NO<sub>3</sub>)<sub>2</sub>, Pb(OAc)<sub>2</sub>, PbI<sub>2</sub>, Pb(SCN)<sub>2</sub>).
- Figure S5.** (a) UPS spectra of w/wo Pb(NO<sub>3</sub>)<sub>2</sub> posttreatment quantum dot films and (b) the corresponding energy band positions for FAPbI<sub>3</sub> quantum dot solar cell.
- Figure S6.** Mechanism passivation for FAPbI<sub>3</sub> quantum dot.
- Figure S7.** Survey XPS spectra of FAPbI<sub>3</sub> quantum dot films w/wo lead salt post-treatment.
- Figure S8.** The optimized geometries of single-anchored crystal structure by DFT calculation: (a) O-H and (b) O-C.
- Figure S9.** The optimized geometries of double-anchored crystal structures by DFT calculation: (a) O-H···O-C, (b) O-H···O-N, (c) O-H···O-H, (d) O-C···O-C.
- Figure S10.** (a) and (b) SEM images of FAPbI<sub>3</sub> quantum dot films w/wo Pb(NO<sub>3</sub>)<sub>2</sub> post-treatment.
- Figure S11.** FTIR spectra of FAPbI<sub>3</sub> quantum dot films w/wo Pb(NO<sub>3</sub>)<sub>2</sub> post-treatment.
- Figure S12.** PL spectra with electron transport layer of FAPbI<sub>3</sub> quantum dot films w/wo Pb(NO<sub>3</sub>)<sub>2</sub> post-treatment.
- Figure S13.** TPV curve of FAPbI<sub>3</sub> quantum dot devices w/wo Pb(NO<sub>3</sub>)<sub>2</sub> post-treatment.
- Figure S14.** Absorption spectra stabilities of FAPbI<sub>3</sub> quantum dot films w/wo Pb(NO<sub>3</sub>)<sub>2</sub> posttreatment.
- Figure S15.** The corresponding relative absorption stabilities upon humidity of 20 % and room temperature at 660 nm.
- Figure S16.**  $J_{ph}$ - $V_{eff}$  curves of the FAPbI<sub>3</sub> quantum dot solar cell w/wo Pb(NO<sub>3</sub>)<sub>2</sub>

posttreatment.

**Figure S17.** Mott-Schottky fitting to the C-V data of the FAPbI<sub>3</sub> quantum dot solar cells w/wo Pb(NO<sub>3</sub>)<sub>2</sub> post-treatment.

### **Supplementary Tables**

**Table S1.** The calculated binding energies and interatomic distances in the optimized structures.

**Table S2.** TRPL paraments of w/wo Pb(NO<sub>3</sub>)<sub>2</sub> of FAPbI<sub>3</sub> quantum dot films.

**Table S3.** TPC paraments of w/wo Pb(NO<sub>3</sub>)<sub>2</sub> of FAPbI<sub>3</sub> quantum dot films.

**Table S4.** TPV paraments of w/wo Pb(NO<sub>3</sub>)<sub>2</sub> of FAPbI<sub>3</sub> quantum dot films.

### **Supplementary References**

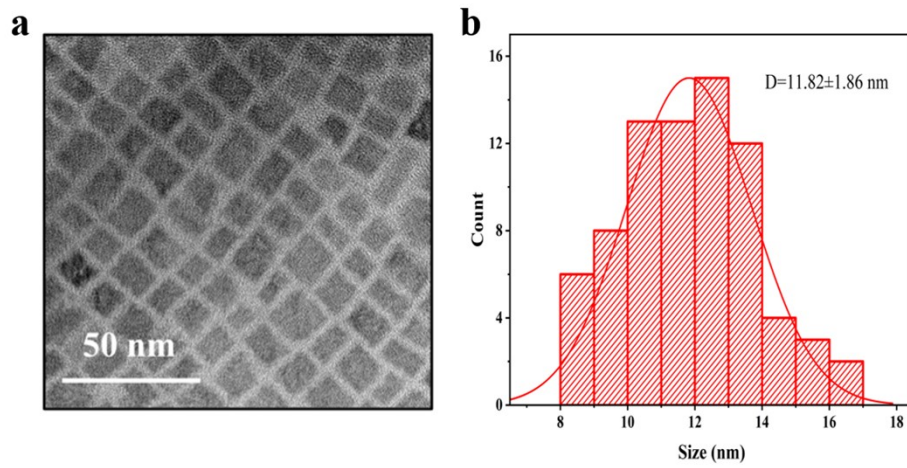

**Fig. S1** (a) TEM image and (b) the corresponding size distribution of FAPbI<sub>3</sub> quantum dots.

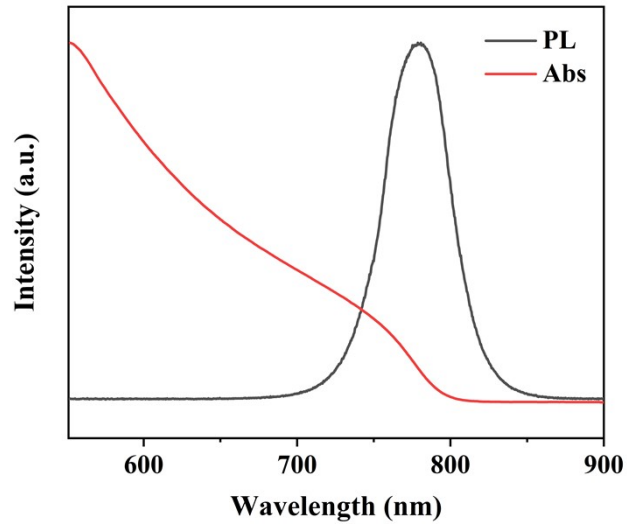

**Fig. S2** The UV- visible absorption and steady-state PL spectrum of FAPbI<sub>3</sub> quantum dot solution in hexane.

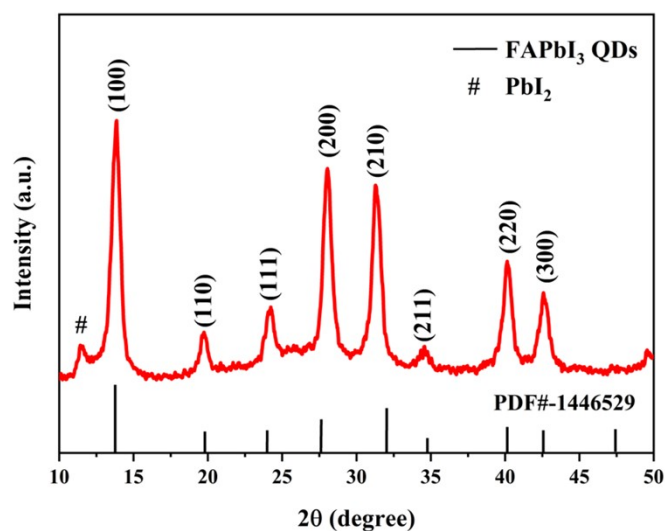

**Fig. S3** XRD pattern of FAPbI<sub>3</sub> quantum dot solution.

The XRD was further applied to explore the possible variations of the crystal structure of FAPbI<sub>3</sub> quantum dot. As shown in **Fig. S3**, the three main diffraction peaks at 13.8°, 28.0° and 42.6° correspond to the typical diffraction peaks of the (100), (200) and (210) lattice planes of FAPbI<sub>3</sub> quantum dots, respectively. This demonstrates the integrity of the crystal structure of the prepared quantum dots.

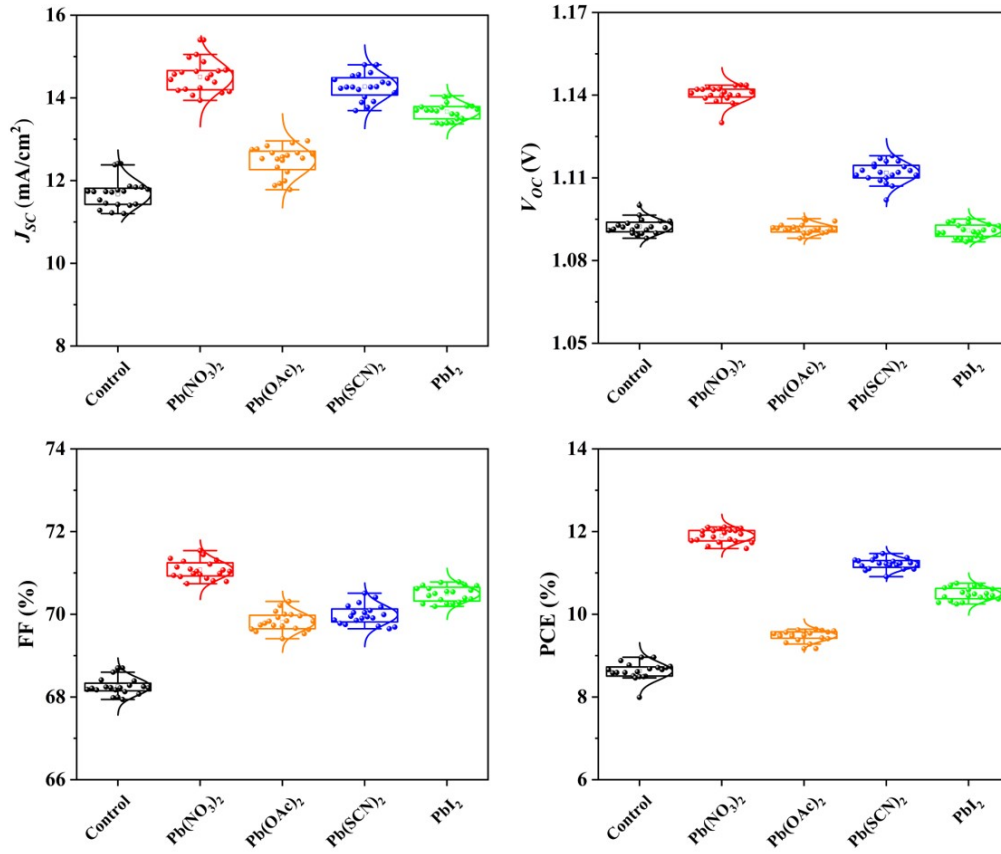

**Fig. S4** Photovoltaic performance evolutions ( $J_{SC}$ ,  $V_{OC}$ , FF, and PCE) of FAPbI<sub>3</sub> quantum dot solar cells using four kinds of Pb-salts (Control, Pb(NO<sub>3</sub>)<sub>2</sub>, Pb(OAc)<sub>2</sub>, PbI<sub>2</sub>, Pb(SCN)<sub>2</sub>).

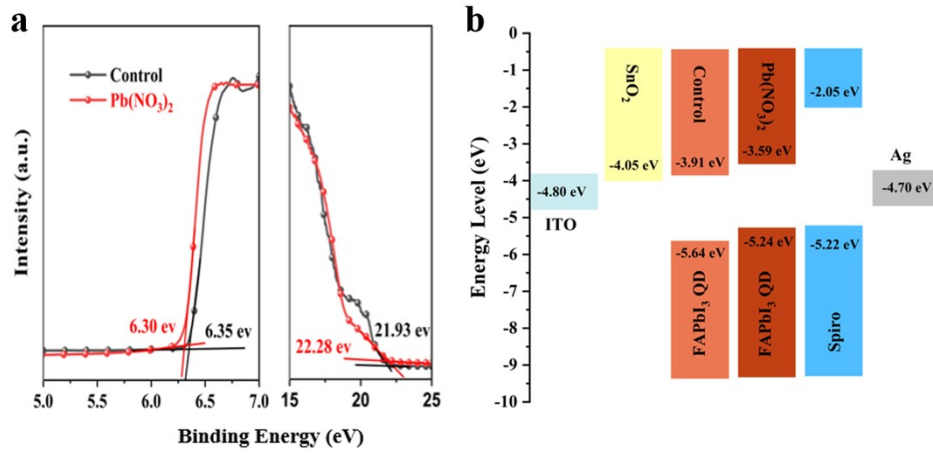

**Fig. S5** (a) UPS spectra of w/wo  $\text{Pb}(\text{NO}_3)_2$  posttreatment quantum dot films and (b) the corresponding energy band positions for  $\text{FAPbI}_3$  quantum dot solar cell.

UPS measurement is used to calculate the energy levels of original and  $\text{Pb}(\text{NO}_3)_2$ -based solid films. The position of the valence band top is calculated by the following formula:<sup>S1</sup>

$$E_{Homo} = -(\hbar\nu - E_{cutoff} + E_{VBF})$$

(Eq. 1)

Where  $\hbar\nu$ ,  $E_{cutoff}$  and  $E_{VBF}$  in the formula represent photon energy, secondary electron cutoff energy, and injection barrier in turn. The calculated  $E_{Homo}$  values are -5.64 eV, and -5.24 eV for control and  $\text{Pb}(\text{NO}_3)_2$ -based film, respectively. The energy level values of  $\text{SnO}_2$  and 2,2',7,7'-tetrakis(N,N-di-p-methoxyphenylamine)-9,9'-spirobifluorene(SpiroOMeTAD) were obtained from the literature.<sup>错误!未找到引用源。</sup> We can see that the positions of VBM and CBM of  $\text{Pb}(\text{NO}_3)_2$ -based film are slightly upward than the original control film in **Fig. S5b**, which leads to a more favorable energy level arrangement inside the perovskite solar cell. This favorable energy level arrangement can promote the extraction of charge carriers.<sup>S1</sup>



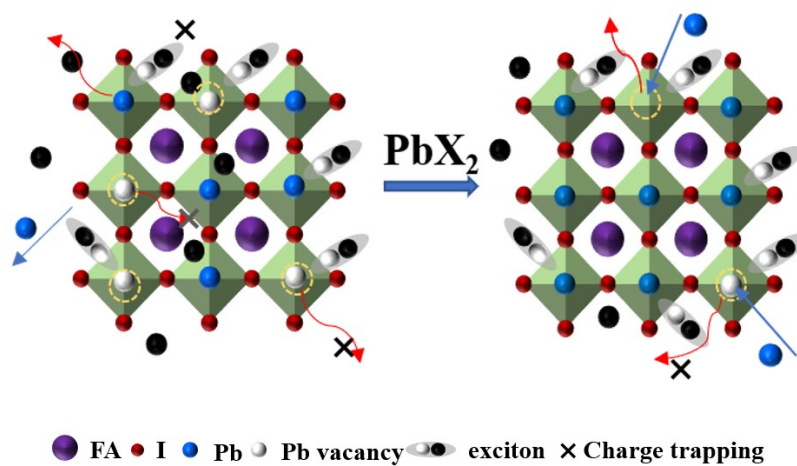

**Fig. S6** Mechanism passivation for FAPbI<sub>3</sub> quantum dot.

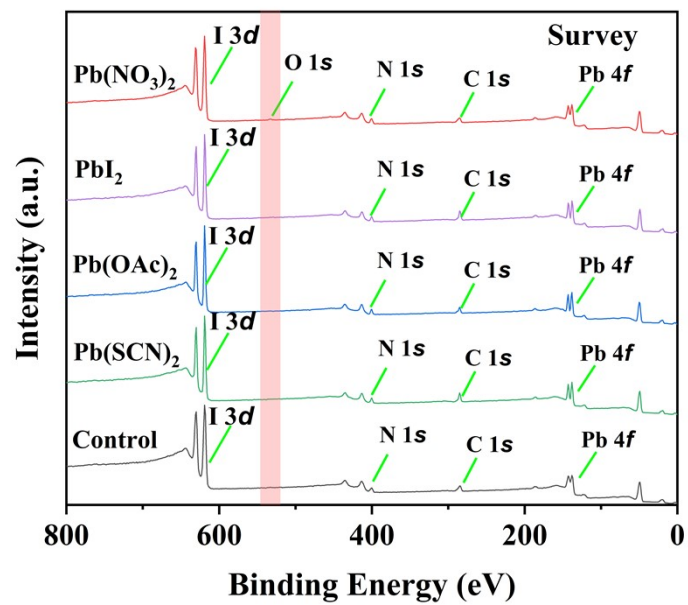

**Fig. S7** Survey XPS spectra of  $\text{FAPbI}_3$  quantum dot films w/wo lead salt post-treatment.

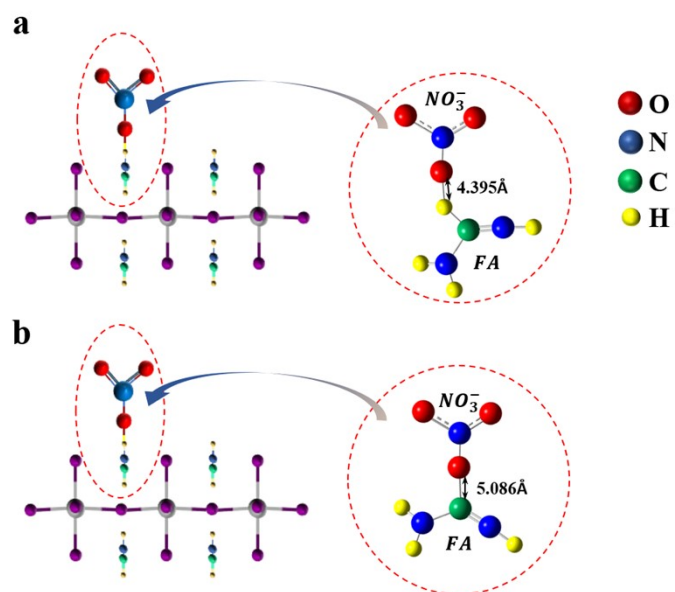

**Fig. S8** The optimized geometries of single-anchored crystal structure calculated by DFT calculation: (a) O-H and (b) O-C.

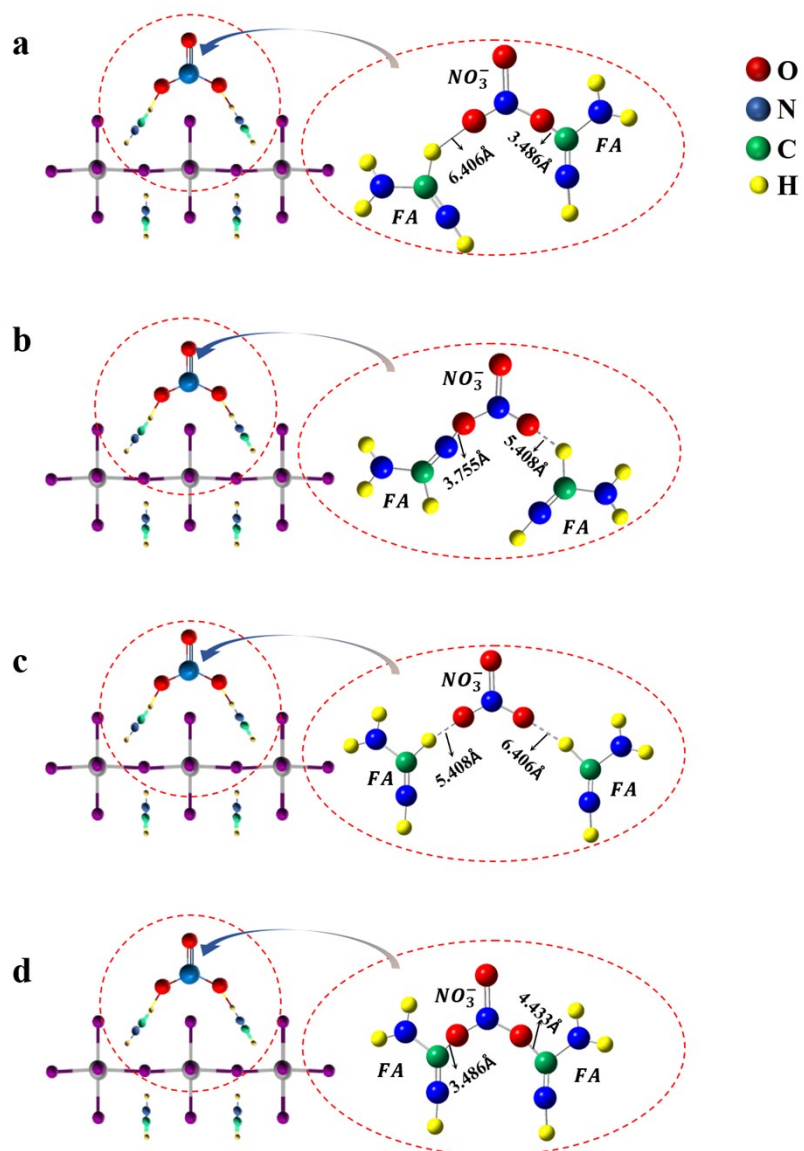

**Fig. S9** The optimized geometries of double-anchored crystal structures by DFT calculation: (a) O-H...O-C, (b) O-H...O-N, (c) O-H...O-H, (d) O-C...O-C.

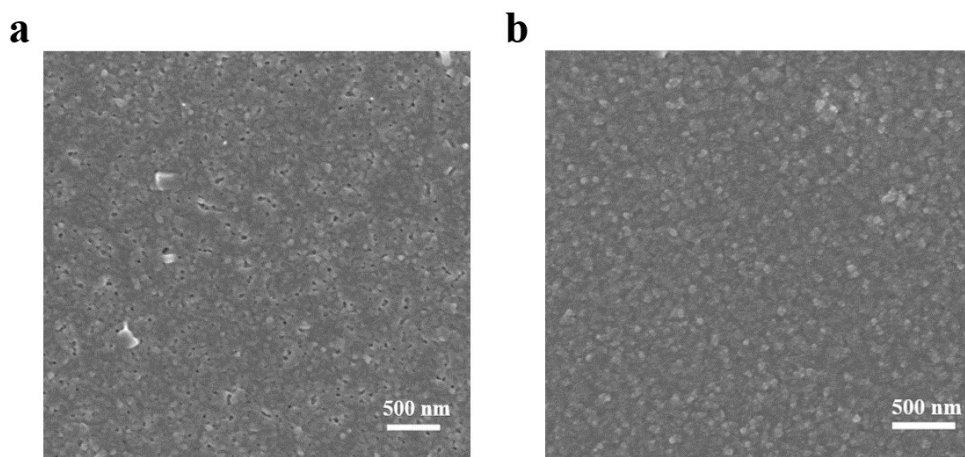

**Fig. S10** (a) and (b) SEM images of FAPbI<sub>3</sub> quantum dot films w/wo Pb(NO<sub>3</sub>)<sub>2</sub> posttreatment.

To investigate the effect of Pb(NO<sub>3</sub>)<sub>2</sub> additives on grain growth, the surface morphology of FAPbI<sub>3</sub> quantum dot films were meticulously examined employing scanning electron microscopy (SEM). In **Fig. S10**, reveal that the Pb(NO<sub>3</sub>)<sub>2</sub>-based film exhibits a denser array of quantum dots with significantly fewer pinholes compared to the control film. This notable enhancement can be attributed to a multitude of contributory factors. Principally, the introduction of Pb(NO<sub>3</sub>)<sub>2</sub> alters the surface chemistry of perovskite quantum dots by supplying essential Pb ions, building a Pb-rich environment. This facilitates tighter packing of crystals, consequently reducing both the porosity and defect density within the film. Additionally, Pb(NO<sub>3</sub>)<sub>2</sub> undergoes chemical reactions with the FA<sup>+</sup> ions present within the FAPbI<sub>3</sub> quantum dots, forming new chemical bonds that enhance the adhesion and density of the film. Additionally, owing to the inherently dynamic nature of halide perovskite quantum dots, the post-treatment regimen with nitrate salts triggers a partial recrystallization phenomenon on the surfaces thereof.

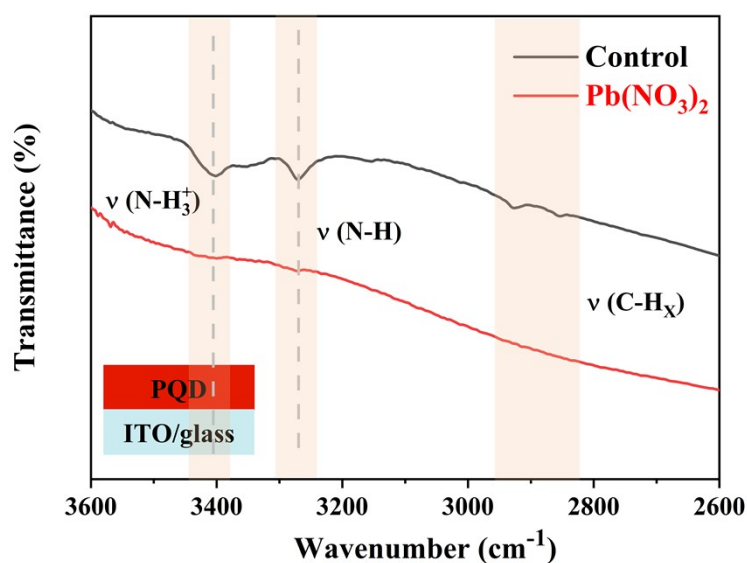

**Fig. S11** FTIR spectra of FAPbI<sub>3</sub> quantum dot films w/wo Pb(NO<sub>3</sub>)<sub>2</sub> post-treatment.

The surface chemistry environment of quantum dot films w/wo Pb(NO<sub>3</sub>)<sub>2</sub> post-treatment was first characterized by Fourier transform infrared (FTIR). As displayed in **Fig. S11**, the peaks at 3403 cm<sup>-1</sup> and 3272 cm<sup>-1</sup> can be attributed to N-H<sub>3</sub><sup>+</sup> and N-H scissor bending in oleylamine, and the peak at 2930 cm<sup>-1</sup> and 2858 cm<sup>-1</sup> are ascribed to the C-H<sub>X</sub> scissor bending in oleic acid, are observed for the control films.<sup>S2</sup> For Pb(NO<sub>3</sub>)<sub>2</sub>-based film, the peaks described above almost disappear, which indicates that Pb(NO<sub>3</sub>)<sub>2</sub> facilitates the removal of oleic acid and oleylamine ligands, thereby fabricating an excellent surface chemical environment for the quantum dot film.

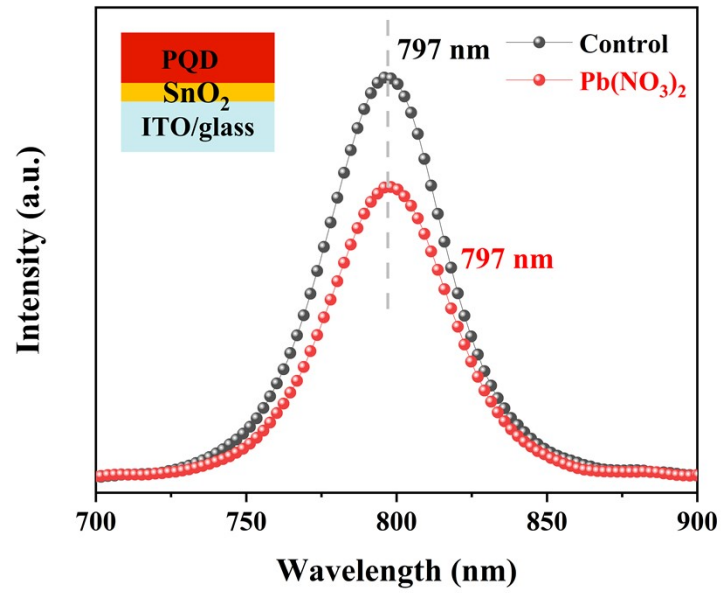

**Fig. S12** PL spectra with electron transport layer of FAPbI<sub>3</sub> quantum dot films w/wo Pb(NO<sub>3</sub>)<sub>2</sub> post-treatment.

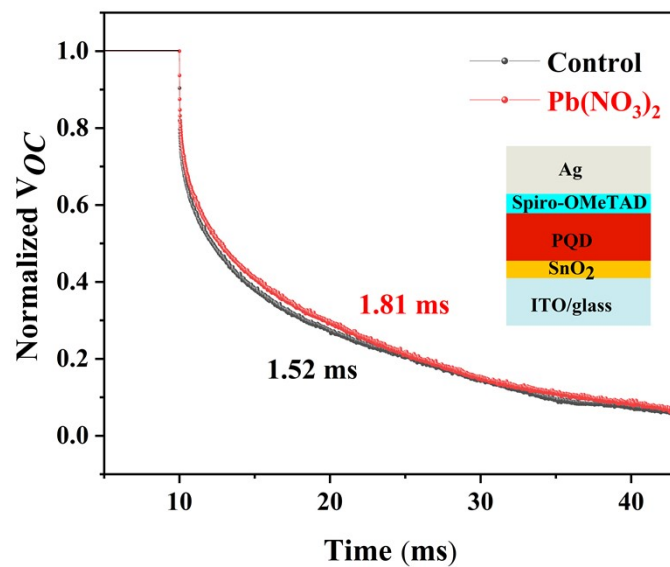

**Fig. S13** TPV curve of FAPbI<sub>3</sub> quantum dot devices w/wo Pb(NO<sub>3</sub>)<sub>2</sub> post-treatment.



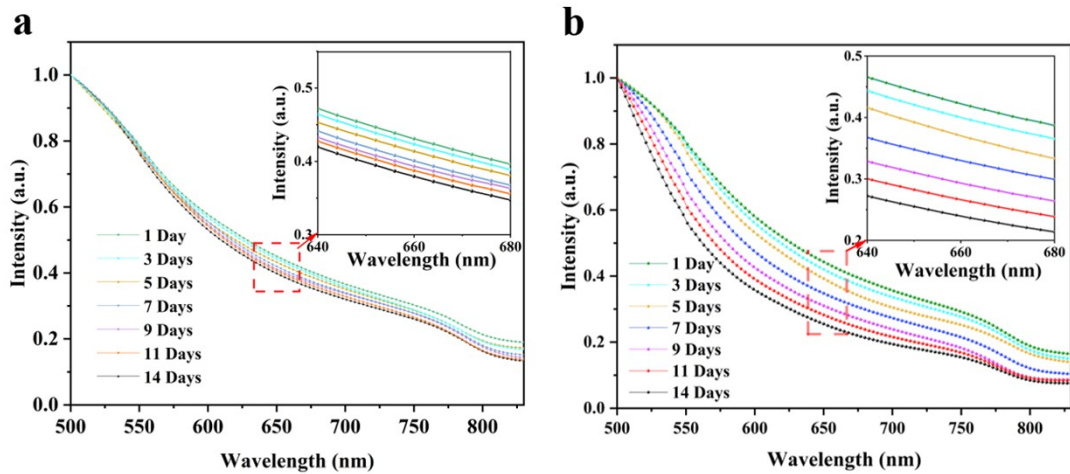

**Fig. S14** (a) and (b) Absorption spectra stabilities of FAPbI<sub>3</sub> quantum dot films w/wo Pb(NO<sub>3</sub>)<sub>2</sub> posttreatment.

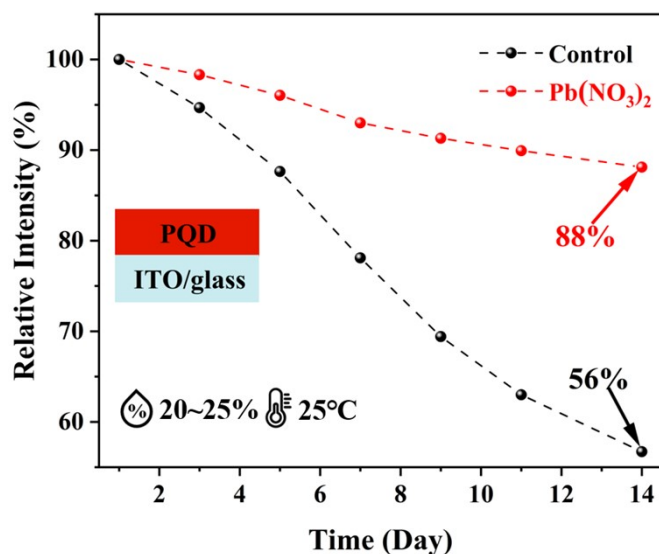

**Fig. S15** The corresponding relative absorption stabilities upon humidity of 20 % and room temperature at 660 nm.

To verify the stability of FAPbI<sub>3</sub> quantum dot films with double-anchored structure, the stability of control and Pb(NO<sub>3</sub>)<sub>2</sub>-based films under ambient conditions of 25 % humidity was evaluated (**Fig. S14**). The absorbance of the Pb(NO<sub>3</sub>)<sub>2</sub>-based film maintains its initial 78% at 660 nm after 14 days, while the control film decreases to 54%, as shown in **Fig. S15**. The absorbance attenuation of the control film is significantly faster than that of the Pb(NO<sub>3</sub>)<sub>2</sub>-based film. These results reveal that the stability of quantum dot films is significantly improved after repairing the surface defects of V<sub>Pb2+</sub> and V<sub>FA+</sub>.

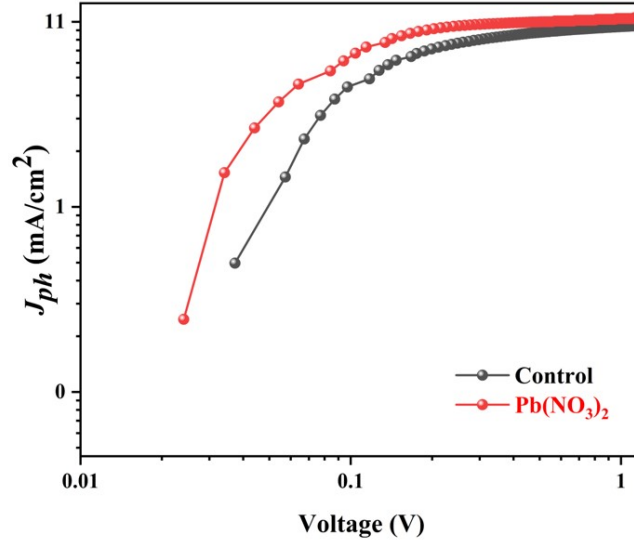

**Fig. S16.**  $J_{ph}$ - $V_{eff}$  curves of the FAPbI<sub>3</sub> quantum dot solar cell w/wo Pb(NO<sub>3</sub>)<sub>2</sub> posttreatment.

The relationship between photocurrent density ( $J_{ph}$ ) and effective voltage ( $V_{eff}$ ) is a common indicator for assessing the charge carrier extraction efficiency in photovoltaic devices. The  $J_{ph}$  is defined as  $J_{ph} = J_{light} - J_{dark}$ , and  $V_{eff}$  is expressed as  $V_{eff} = V_0 - V_a$ , wherein  $V_0$  represents the voltage when  $J_{ph} = 0 \text{ mA cm}^{-2}$ , and  $V_a$  is applied as the bias voltage. With a growth in  $V_{eff}$ ,  $J_{ph}$  linearly increases in the low  $V_{eff}$  region and then becomes saturated in the high  $V_{eff}$  region. Saturated  $J_{ph}$  represents the photogenerated carrier collected by the electrode at the low bias voltage stage.<sup>S3</sup> **Fig. S16** shows that the  $J_{ph}$  of the Pb(NO<sub>3</sub>)<sub>2</sub>-based device is higher than the control device, indicating more efficient carrier extraction and transport in the former, which also contributes to the higher current density.

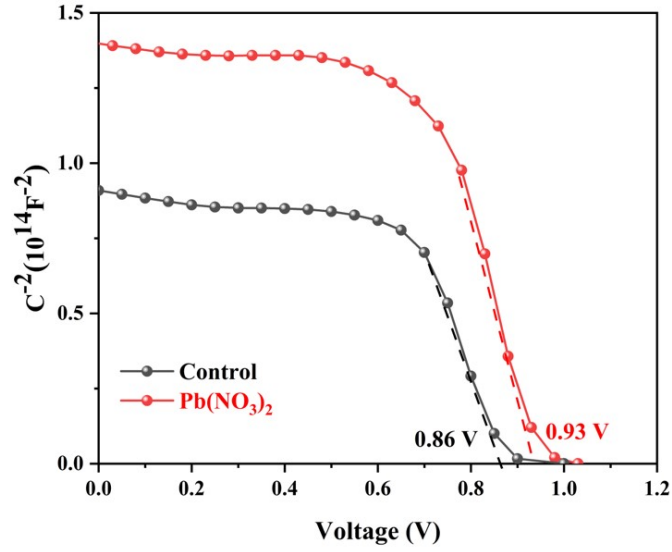

**Fig. S17.** Mott-Schottky fitting to the C-V data of the FAPbI<sub>3</sub> quantum dot solar cells w/wo Pb(NO<sub>3</sub>)<sub>2</sub> post-treatment.

The reduced trap density in solid quantum dot films could also impact the built-in potential ( $V_{bi}$ ) of PQDSCs, which is crucial for the extraction of charge carriers in PQDSCs. As shown in **Fig. S17**, the  $V_{bi}$  of the Pb(NO<sub>3</sub>)<sub>2</sub>-based device is much higher than that of the control device. The enhanced  $V_{bi}$  is more beneficial in promoting charge separation and preventing carrier recombination, thus improving the charge collection efficiency of cells.

## Theoretical calculations

**Table S1** The calculated binding energies and interatomic distances in the optimized structures.

| Bonding mode | Binding Energy (eV) | Distance (Å) |
|--------------|---------------------|--------------|
| C-O          | -7.46               | 5.086        |
| N-O          | -8.93               | 3.861        |
| H-O          | -8.89               | 4.395        |
| H-O          | -9.25               | 6.406        |
| O-H          |                     | 5.408        |
| C-O          | -10.04              | 3.486        |
| O-C          |                     | 4.430        |
| C-O          | -9.49               | 3.486        |
| O-H          |                     | 6.406        |
| N-O          | -9.1                | 3.755        |
| O-H          |                     | 5.408        |
| N-O          | -10.51              | 3.775        |
| C-O          |                     | 3.486        |

**Table S2** TRPL parameters of w/wo Pb(NO<sub>3</sub>)<sub>2</sub> of FAPbI<sub>3</sub> quantum dot films.

| Sample                            | A <sub>1</sub> | τ <sub>1</sub> (ns) | A <sub>2</sub> | τ <sub>2</sub> (ns) | τ <sub>ave</sub> (ns) |
|-----------------------------------|----------------|---------------------|----------------|---------------------|-----------------------|
| Control                           | 65.77          | 10.28               | 12.18          | 70.79               | 44.20                 |
| Pb(NO <sub>3</sub> ) <sub>2</sub> | 46.12          | 14.11               | 13.80          | 74.92               | 51.44                 |

The PL decay was fitted using the following equation,<sup>S4</sup>

$$I(t) = A_1 \cdot \exp\left(-\frac{t}{\tau_1}\right) + A_2 \cdot \exp\left(-\frac{t}{\tau_2}\right) + A_0 \quad (\text{Eq. 2})$$

where A<sub>0</sub>, A<sub>1</sub> and A<sub>2</sub> are constants, t is PL decay time, τ is the fitted lifetime. The average lifetime (τ<sub>ave</sub>) was calculated by the following equation,<sup>S4</sup>

$$\tau_{ave} = \frac{A_1 \tau_1^2 + A_2 \tau_2^2}{A_1 \tau_1 + A_2 \tau_2} \quad (\text{Eq. 3})$$

**Table S3** TPC paraments of w/wo Pb(NO<sub>3</sub>)<sub>2</sub> of FAPbI<sub>3</sub> quantum dot films.

| Sample                            | A <sub>1</sub>       | τ <sub>1</sub> (μs) |
|-----------------------------------|----------------------|---------------------|
| Control                           | 1.31×10 <sup>6</sup> | 2.98                |
| Pb(NO <sub>3</sub> ) <sub>2</sub> | 2.39×10 <sup>8</sup> | 2.17                |

The fitted function for  $J_{SC}$  decay is shown in Eq. 4,<sup>S5</sup>

$$J_{SC} = A_1 \cdot \exp\left(-\frac{t}{\tau_1}\right) + A_0 \quad (\text{Eq. 4})$$

where  $A_0$  and  $A_1$  are constants,  $t$  is  $J_{SC}$  decay time,  $\tau_1$  is the fitted lifetime.

**Table S4** TPV paraments of w/wo Pb(NO<sub>3</sub>)<sub>2</sub> of FAPbI<sub>3</sub> quantum dot films.

| Sample                            | A <sub>1</sub> | τ <sub>1</sub> (ms) | A <sub>2</sub> | τ <sub>2</sub> (ms) | τ <sub>ave</sub> (ms) |
|-----------------------------------|----------------|---------------------|----------------|---------------------|-----------------------|
| Control                           | 142.25         | 1.24                | 0.19           | 17.00               | 1.52                  |
| Pb(NO <sub>3</sub> ) <sub>2</sub> | 86.65          | 1.35                | 0.20           | 17.47               | 1.81                  |

The fitted function of TPV curves is shown in Eq. 5,<sup>S6</sup>

$$V_{OC} = A_1 \cdot \exp\left(-\frac{t}{\tau_1}\right) + A_2 \cdot \exp\left(-\frac{t}{\tau_2}\right) + A_0 \quad (\text{Eq. 5})$$

where A<sub>0</sub>, A<sub>1</sub> and A<sub>2</sub> are constants, t is V<sub>OC</sub> decay time, τ is the fitted lifetime. The average lifetime (τ<sub>ave</sub>) was calculated by the following equation,

$$\tau_{ave} = \frac{A_1 \tau_1^2 + A_2 \tau_2^2}{A_1 \tau_1 + A_2 \tau_2} \quad (\text{Eq. 6})$$



## Supporting References

- S1 C. Zhang, X. Yin, G. Chen, Z. Sang, Y. Yang, W. Que, *ACS Photonics*, 2023, **10**, 790-800.
- S2 J. Yuan, C. Bi, J. Xi, R. Guo, J. Tian, *J. Phys. Chem. Lett.*, 2021, **12**, 1018-1024.
- S3 W. Zhu, Q. Zhang, D. Chen, Z. Zhang, Z. Lin, J. Chang, J. Zhang, C. Zhang, Y. Hao, *Adv. Energy Mater.*, 2018, **8**, 1802080.
- S4 X. Fu, T. He, S. Zhang, X. Lei, Y. Jiang, D. Wang, P. Sun, D. Zhao, H.-Y. Hsu, X. Li, M. Wang, M. Yuan, *Chem*, 2021, **7**, 3131-3143.
- S5 X. Zhang, J. Zhang, D. Phuyal, J. Du, L. Tian, V. A. Öberg, M. B. Johansson, U. B. Cappel, O. Karis, J. Liu, *Adv. Energy Mater.*, 2018, **8**, 1702049.
- S6 L. Zhang, C. Kang, G. Zhang, Z. Pan, Z. Huang, S. Xu, H. Rao, H. Liu, S. Wu, X. Wu, *Adv. Funct. Mater.*, 2021, **31**, 2005930.
